# Supplementary material
Source: PubMed Central journal article supplement (PMC5439417)

SUPPLEMENTARY DATA

**Supplementary Table 1.** Frequency Distribution of ECG Abnormalities by CVD Status

|                                                                                                                                                                                       | CVD Status         |                                  |
|---------------------------------------------------------------------------------------------------------------------------------------------------------------------------------------|--------------------|----------------------------------|
|                                                                                                                                                                                       | Yes (N=155)        | No (N=1151)                      |
| <b>Major ECG abnormality*</b>                                                                                                                                                         | <b>79 (51.0%)</b>  | <b>166 (14.4%)<sup>††</sup></b>  |
| Major ventricular Conduction Defects                                                                                                                                                  | 14                 | 49                               |
| Major Q wave abnormalities                                                                                                                                                            | 53                 | 34                               |
| Minor Q/QS waves with major ST/T abnormalities                                                                                                                                        | 12                 | 5                                |
| Major isolated ST/T abnormalities                                                                                                                                                     | 22                 | 83                               |
| Left ventricular hypertrophy with strain pattern                                                                                                                                      | 0                  | 5                                |
| Atrial fibrillation/flutter                                                                                                                                                           | 1                  | 1                                |
| Major atrioventricular conduction defects                                                                                                                                             | 0                  | 0                                |
| Major QT prolongation                                                                                                                                                                 | 7                  | 12                               |
| Pacemaker                                                                                                                                                                             | 1                  | 3                                |
| Others: AV dissociation, ventricular tachycardia , Wolf-Parkinson-White syndrome/pre-excitation                                                                                       | 1                  | 1                                |
| <b>Minor ECG abnormality*</b>                                                                                                                                                         | <b>141 (91.0%)</b> | <b>1006 (87.4%)<sup>††</sup></b> |
| Minor isolated Q/QS waves abnormalities                                                                                                                                               | 61                 | 164                              |
| Minor isolated ST/T abnormalities                                                                                                                                                     | 87                 | 335                              |
| High R waves                                                                                                                                                                          | 18                 | 131                              |
| Non-ischemic ST segment elevation                                                                                                                                                     | 23                 | 183                              |
| Incomplete bundle branch blocks                                                                                                                                                       | 59                 | 378                              |
| Minor QT Prolongation                                                                                                                                                                 | 17                 | 47                               |
| Short PR interval                                                                                                                                                                     | 22                 | 233                              |
| Axis deviation                                                                                                                                                                        | 28                 | 117                              |
| Isolated premature ventricular ectopic beats                                                                                                                                          | 17                 | 104                              |
| Others: Premature atrial beats, low QRS voltage, abnormal P-wave amplitude , wandering atrial pacemaker, prolonged PR interval , marked sinus bradycardia or marked sinus tachycardia | 72                 | 521                              |
| <b>Any ECG abnormality*</b>                                                                                                                                                           | <b>143 (92.3%)</b> | <b>1014 (88.1%)<sup>††</sup></b> |

\* The sum of individual ECG abnormalities under each category of major, minor, or major/minor ECG abnormalities is larger than the total number of major, minor, and major/minor abnormalities, respectively. This is because some patients have more than 1 abnormality (with overlap). However, the reported “overall” minor, major, or minor/major abnormalities represent the proportion of participants with at least 1 ECG abnormality (with no overlap).

† The order and grouping of abnormalities is per the rules of Minnesota ECG classification. This includes grouping of others.

††p<0.001 for major ECG abnormalities but non-significant for minor or any abnormalities

SUPPLEMENTARY DATA

Supplementary Figure 1.

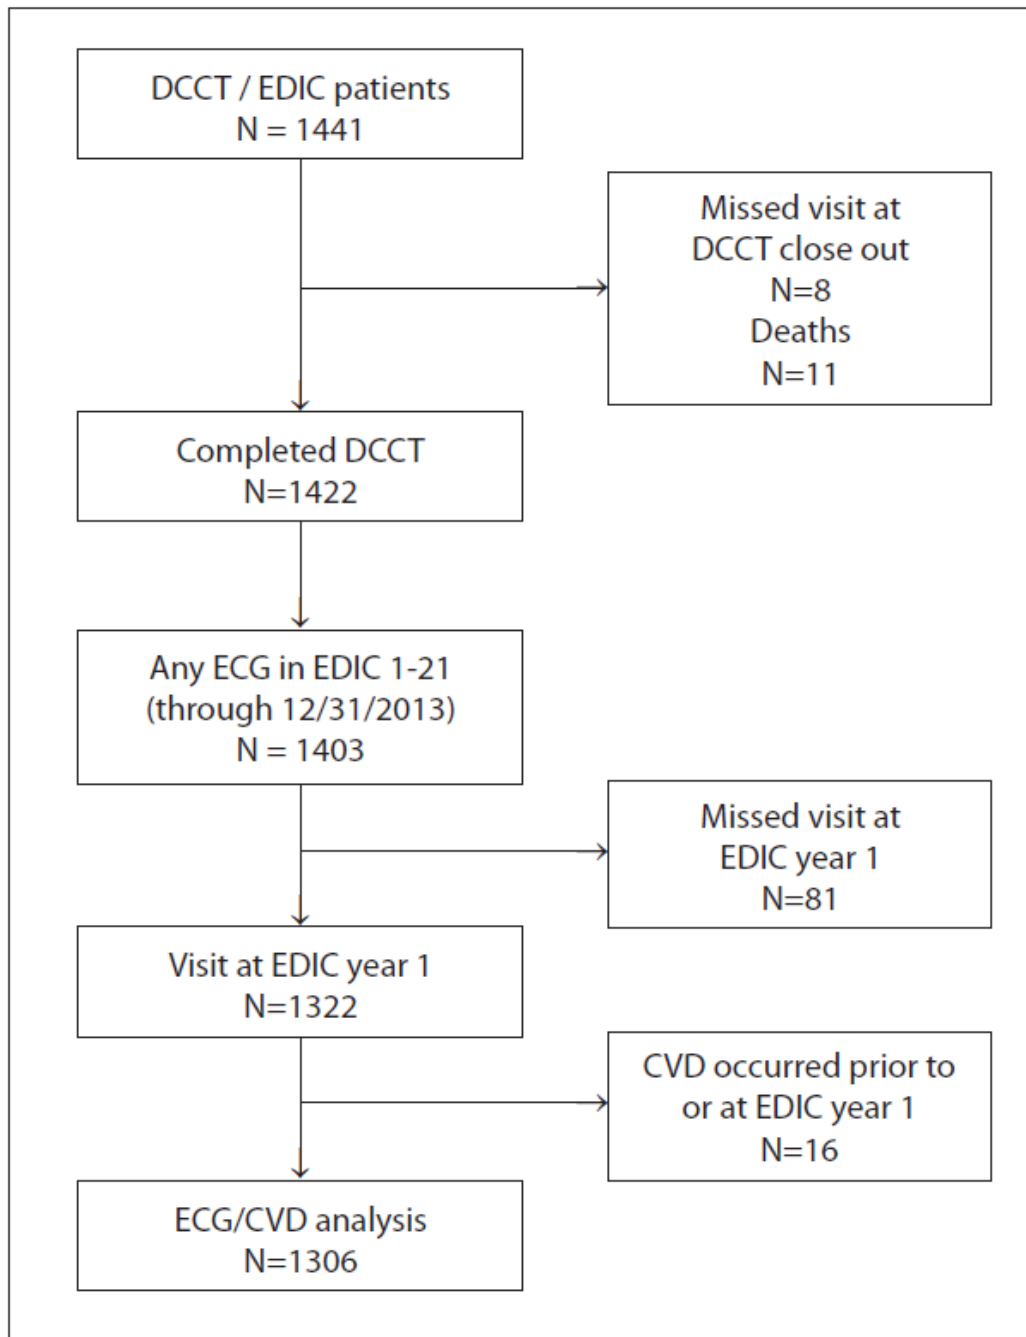

Supplement: DC162050SupplementaryData.pdf [file DC162050SupplementaryData.pdf]
